# Supplementary material for: OCSO: Off-the-cloud service optimization for green efficient service resource utilization
Source: Springer Nature journal article supplement (doi:10.1186/s13677-014-0009-1), 2014-06-14
Supplement: MOESM1 [file 10743558]

# Appendix

## OCSO dynamic threshold triggering algorithm

```
1 package Green;
2
3 import java.io.IOException;
4 import java.util.Calendar;
5 import java.util.LinkedList;
6 import java.util.Timer;
7 import java.util.TimerTask;
8
9 import org.w3c.dom.Element;
10
11 import Green.OCSOOptimizationFacilitator.UtilizationRegulator;
12 import Green.OCSOOptimizationExecutor.ServiceOptimizer.IaaSOptimization;
13 import Green.OCSOOptimizationExecutor.ServiceOptimizer.PaaSOptimization;
14 import Green.OCSOOptimizationExecutor.RuleEvolution;
15 import OCSOOperation.FileOperation;
16 import OCSOOperation.RuleParser;
17
18 public class ScalingOptimization {
19
20     private LinkedList<Element> optimizationRules = null;
21     private LinkedList<Integer> optimizationFrequencies = null;
22     private LinkedList<Integer[]> optimizationCounters = null;
23     private static LinkedList<Integer[]> finalOptimizationThresholds = null;
24     private static LinkedList<Integer> finalOptimizationUpLimits = null;
25     private static LinkedList<Integer> finalOptimizationDownLimits = null;
26     private LinkedList<String> optimizationIDs = null;
27     private LinkedList<String> optimizationTypes = null;
28     private LinkedList<String> optimizationServices = null;
29     private LinkedList<String> applications = null;
30     private LinkedList<String> instances = null;
31     private LinkedList<Timer> optimizationTimers = null;
32     private LinkedList<Schedule> optimizationSchedules = null;
33     private static String configFilePath = "src/configuration.txt";
34     private static String ruleFilePath = "src/rules.xml";
35     private static String iaasLogFilePath = "src/GreenIaaS/log.txt";
36     private static String paaSLogFilePath = "src/GreenPaaS/log.txt";
37     private boolean[] onGoingOptimization = new boolean[2];
38     private final static int milisecond = 60000;
39     private final static int delay = 1000;
40     private FileOperation fo = new FileOperation();
41     private RuleParser rp;
42
43     public ScalingOptimization() {
44
45         rp = new RuleParser(ruleFilePath);
46         optimizationRules = rp.getAllOptimizationRules();
47         optimizationIDs = rp.getAllRuleIDs();
48         optimizationFrequencies = rp.getAllOptimizationFrequencies();
49         optimizationCounters = rp.getAllOptimizationCounters();
50         finalOptimizationUpLimits = rp.getAllOptimizationUpLimits();
51         finalOptimizationDownLimits = rp.getAllOptimizationDownLimits();
52         finalOptimizationThresholds = rp.getAllOptimizationThresholds();
53         optimizationTypes = rp.getAllOptimizationTypes();
54         optimizationServices = rp.getAllOptimizationServices();
55
56         if (optimizationRules.size() > 0 &&
57             optimizationFrequencies.size() ==
58             optimizationRules.size() &&
59             optimizationRules.size() ==
60             optimizationIDs.size() &&
61             optimizationCounters.size() ==
62             optimizationIDs.size() &&
63             finalOptimizationUpLimits.size() ==
64             optimizationTypes.size() &&
65             finalOptimizationDownLimits.size() ==
66             optimizationTypes.size() &&
67             optimizationRules.size() ==
68             optimizationTypes.size() &&
69             optimizationRules.size() ==
70             optimizationServices.size()) {
71             System.out.println(
72                 "*** " + optimizationRules.size() +
73                 " rules initialized ***" + optimizationRules);

```

```

74 optimizationSchedules = new LinkedList<Schedule>();
75 optimizationTimers = new LinkedList<Timer>();
76 applications = new LinkedList<String>();
77 instances = new LinkedList<String>();
78 //initiate objects
79 int instanceNo = 0; int applicationNo = 0;
80 onGoingOptimization[0] = false;
81 onGoingOptimization[1] = false;
82 for (int i = 0; i < optimizationRules.size(); i++) {
83     if (optimizationTypes.get(i).contains("IaaSOptimization")) {
84         instanceNo++;
85         instances.add(rp.getIaaSInstance(optimizationRules.get(i)));
86         //create new schedule for IaaS optimisation
87         optimizationSchedules.add(new Schedule(
88             optimizationRules.get(i), i, instanceNo-1));
89
90         //create new timer for IaaS optimisation
91         optimizationTimers.add(new Timer());
92         GreenIaaSPanel.refreshConsole(
93             " Initiating Monitor schedule for " +
94             optimizationIDs.get(i));
95         fo.addToLog(iaasLogFilePath,
96             "Initiating Monitor schedule for " +
97             optimizationIDs.get(i));
98     } else if (
99         optimizationTypes.get(i).contains("PaaSOptimization")) {
100         applicationNo++;
101         applications.add(rp.getPaaSApplication(
102             optimizationRules.get(i)));
103         //create new timer for PaaS optimisation
104         optimizationSchedules.add(
105             new Schedule(optimizationRules.get(i), i,
106                 applicationNo-1));
107         optimizationTimers.add(new Timer()); //create new timer for PaaS
108 optimisation
109         GreenPaaSPanel.refreshConsole(
110             " Initiating Monitor schedule for " +
111             optimizationIDs.get(i));
112         fo.addToLog(paaSLogFilePath,
113             "Initiating Monitor schedule for " +
114             optimizationIDs.get(i));
115     } else {
116         System.err.println(
117             "Err validating optimization type #1 " +
118             optimizationTypes.get(i) +
119             " id: " + optimizationIDs.get(i) +
120             Calendar.getInstance().getTimeInMillis());
121     }
122 }
123 /* begin periodical schedule according to specified
124 running frequencies for each services; */
125 for (int i = 0; i < optimizationFrequencies.size(); i++) {
126     String id = optimizationIDs.get(i);
127     int frequency = optimizationFrequencies.get(i);
128     System.out.println(id + " will be running at " + frequency);
129     optimizationTimers.get(i).scheduleAtFixedRate(
130         optimizationSchedules.get(i), delay,
131         (int) Math.round((millisecond*frequency)));
132     System.out.println(" Initiating Monitor schedule for " +
133         optimizationIDs.get(i));
134 }
135
136 } else {
137     System.err.println("Error reading rules... " +
138         Calendar.getInstance().getTimeInMillis());
139 }
140 }
141
142 public LinkedList<Timer> returnAllTimer() {
143     return optimizationTimers;
144 }
145
146 public LinkedList<Green.ScalingOptimization.Schedule> returnAllSchedule() {
147     return optimizationSchedules;
148 }
149
150 public boolean[] ongoingOptimisation() {
151     return onGoingOptimization;

```

```

152     }
153
154     public class Schedule extends TimerTask {
155
156         //initialise and retrieving data from individual rules:
157         public Integer[] threshold = new Integer[2];
158         public LinkedList<String> metrics = new LinkedList<String>();
159         public LinkedList<Integer> periods = new LinkedList<Integer>();
160         public LinkedList<String> statistics = new LinkedList<String>();
161         public String ruleID = new String("");
162         public Integer[] counter = new Integer[2];
163         public int downLimit = 0;
164         public int upLimit = 0;
165         public int frequency = 0;
166         public int monitorInternalInterval = 0;
167         public int monitorInternalValuesCount = 0;
168         public int latestMonitorValue = 0;
169         public int i = 0; public int j = 0;
170         public String optimizationType = new String("");
171         public String optimizationService = new String("");
172         public String instanceID = new String("");
173         public String applicationName = new String("");
174         Integer[] continueScalingCount = {0,0};
175         UtilizationRegulator ur;
176         RuleEvolution re;
177         public LinkedList<Integer> filteredMonitorValues =
178             new LinkedList<Integer>();
179         public LinkedList<Integer> monitorDataValues =
180             new LinkedList<Integer>();
181
182         Schedule(Element rule, int i, int j) {
183             super();
184             //fetch additional parameters from rules for each optimisation
185             this.i = i; this.j = j;
186             this.ruleID = optimizationIDs.get(i);
187             threshold = rp.getAllOptimizationThresholds().get(i);
188             counter = optimizationCounters.get(i);
189             metrics = rp.getTheOptimizationMetrics(ruleID);
190             statistics = rp.getTheOptimizationStatistics(ruleID);
191             downLimit = rp.getAllOptimizationDownLimits().get(i);
192             upLimit = rp.getAllOptimizationUpLimits().get(i);
193             frequency = optimizationFrequencies.get(i);
194             periods = rp.getTheOptimizationPeriods(ruleID);
195             this.monitorInternalInterval =
196                 (int) Math.round(periods.get(0)/frequency/2);
197             this.monitorInternalValuesCount =
198                 (int) Math.round(periods.get(0)/frequency);
199             optimizationType = optimizationTypes.get(i);
200             optimizationService = optimizationServices.get(i);
201             re = new RuleEvolution(ruleFilePath);
202             //utilisation data regulator
203             ur = new UtilizationRegulator(fo, configFilePath);
204             boolean bindingServiceSuccess =
205                 ur.setOptimizationTypeAndProvider(
206                     optimizationType, optimizationService);
207
208             if (ur == null || !bindingServiceSuccess ||
209                 monitorInternalInterval <= 0 || periods.size() <= 0 ||
210                 frequency <= 0 || upLimit <= 0 || re == null ||
211                 downLimit >= upLimit || statistics.size() <= 0 ||
212                 metrics.size() == 0 || threshold[0] <= 0 ||
213                 threshold[1] <= 0 || ruleID.length() == 0 ||
214                 optimizationType.length() == 0 ||
215                 monitorInternalValuesCount <= 0) {
216                 System.err.println(
217                     "Some data formats are wrong, or initiation failed... ");
218             }
219         }
220         System.err.println(
221             "Info -> Utilization Regulator: " + ur + " " +
222             bindingServiceSuccess);
223         System.out.println(
224             "Info -> MonitorInternal: " + monitorInternalInterval);
225         System.out.println("Info -> Period: " + periods);
226         System.out.println("Info -> Frequency: " + frequency);
227         System.out.println("Info -> UpLimit: " + upLimit);
228         System.out.println("Info -> DownLimit: " + downLimit);
229         System.out.println("Info -> Statistics: " + statistics);

```

```

230 System.out.println("Info -> Optimization Type: " + optimizationType);
231 System.out.println("Info -> Metrics: " + metrics);
232 System.out.println("Info -> Threshold[0]: " + threshold[0]);
233 System.out.println("Info -> Threshold[1]: " + threshold[1]);
234 System.out.println("Info -> RuleID: " + ruleID);
235
236 System.out.println(
237     "<< Monitor schedule initiated: " + ruleID +
238     " at Frequency: " + frequency + " >>");
239 if (optimizationType.contains("IaaSOptimization")) {
240     GreenIaaSPanel.refreshConsole(
241         "<< Monitor schedule created: " + ruleID +
242         " at Frequency: " + frequency + " >>");
243     fo.addToLog(iaasLogFilePath,
244         "<< New Monitor schedule created: " + ruleID +
245         " at Frequency: " + frequency + " >>");
246 } else if (optimizationType.contains("PaaSOptimization")) {
247     GreenPaaSPanel.refreshConsole(
248         "<< New Monitor schedule created: " + ruleID +
249         " at Frequency: " + frequency + " >>");
250     fo.addToLog(paaSLogFilePath,
251         "<< New Monitor schedule created: " + ruleID +
252         " at Frequency: " + frequency + " >>");
253 } else {
254     System.err.println(
255         "Err validating optimization type #2: " +
256         optimizationType + Calendar.getInstance().getTimeInMillis());
257 }
258
259 }
260
261 public void run() {
262
263     Integer[] Counter = {0,0}; //clear Counter before each count starts
264     continueScalingCount[0]++; continueScalingCount[1]++;
265     if (continueScalingCount[0] > Math.round(threshold[0]*1.1) ||
266         continueScalingCount[1] > Math.round(threshold[1]*1.1)) {
267         //restore original scaling parameters in case of intermittent
268         optimisation
269         System.out.println(
270             ">>> This " + ruleID + " will be an intermittent scaling, "
271             + "restoring original parameters <<<");
272         /*check whether current rule parameters are the same
273          * as the original one before rule evolution
274          */
275         if (finalOptimizationThresholds.get(i)[0] !=
276             rp.getTheOptimizationThreshold(ruleID)[0] ||
277             finalOptimizationThresholds.get(i)[1] !=
278             rp.getTheOptimizationThreshold(ruleID)[1] ||
279             finalOptimizationUpLimits.get(i) !=
280             rp.getTheOptimizationUpLimit(ruleID) ||
281             finalOptimizationDownLimits.get(i) !=
282             rp.getTheOptimizationDownLimit(ruleID)) {
283             //intermittent scaling needs to restore original values
284             optimizationSchedules.get(i).cancel();
285             if (re.updateThresholds(ruleID,
286                 finalOptimizationThresholds.get(i)) &&
287                 re.updateUpLimit(ruleID, finalOptimizationUpLimits.get(i)) &&
288                 re.updateDownLimit(ruleID,
289                     finalOptimizationDownLimits.get(i))) {
290                 System.out.println(
291                     ">>> " + ruleID +
292                     " original parameters have been restored <<<");
293                 optimizationSchedules.add(i, new Schedule(
294                     rp.getAllOptimizationRules().get(i) , i, j));
295                 optimizationTimers.get(i).scheduleAtFixedRate(
296                     optimizationSchedules.get(i), delay,
297                     (int)Math.round((milisecond*frequency)));
298             } else {
299                 /*intermittent scaling and does not need restore,
300                  continue with current parameters*/
301                 System.err.println(
302                     "!!! Error occured while restoring
303                     original rule parameters");
304             }
305         } else {
306             System.out.println(">>> " + ruleID +
307                 " is with original parameters already <<<");

```

```

308     }
309 }
310
311 if (optimizationType.contains("IaaSOptimization")) { //IaaS optimisation
312     this.instanceID = instances.get(j);
313     if (instanceID.length() == 0) {
314         System.err.println("Error retrieving instance ID... " +
315             Calendar.getInstance().getTimeInMillis());
316     } else {
317         boolean iaasMonitorStatisticsAvailable =
318             ur.isIaaSMonitorDataAvailable(optimizationType,
319                 instanceID, metrics, statistics, periods,
320                 frequency, monitorInternalInterval);
321
322         if (iaasMonitorStatisticsAvailable) {
323             //get latest utilisation data for VM instance
324             latestMonitorValue = ur.getIaaSLatestMonitorStatistics();
325             System.out.println("Monitor data: " + latestMonitorValue);
326             fo.addToLog(iaasLogFilePath,
327                 "# " + ruleID + " with instance " + instanceID +
328                 " RV: " + latestMonitorValue + " at " +
329                 Calendar.getInstance().getTime());
330             //adding data to list for threshold count
331             filteredMonitorValues.add(latestMonitorValue);
332             while (filteredMonitorValues.size() >=
333                 monitorInternalValuesCount) {
334                 filteredMonitorValues.removeFirst();
335             }
336             //threshold count
337             for (int value : filteredMonitorValues) {
338                 if (value >= upLimit || value <= downLimit) {
339
340                     if (value >= upLimit) {
341
342                         Counter[1]++;
343
344                         System.out.println(
345                             "# Updates: Due to " + value + " >=
346                             " + upLimit + ", " + "Uplimit Counter updated
347                             for " + instanceID);
348
349                     } else if (value <= downLimit) {
350                         Counter[0]++;
351                         System.out.println(
352                             "# Updates: Due to " + value + " <=
353                             " + downLimit + ", " + "Downlimit Counter
354                             updated for " + instanceID);
355                     }
356                 } else {
357                     System.out.println(
358                         "# Updates: Monitor value is within limits
359                         for " + instanceID + " in rule: " + ruleID);
360                 }
361             }
362         }
363     }
364     //update counters
365     optimizationCounters.set(i, Counter);
366     re.updateCounters(ruleID, Counter);
367     GreenIaaSPanel.refreshConsole("# Counter Updates for : " +
368         ruleID + ": " + instanceID + Counter[0] + " " + Counter[1]);
369     fo.addToLog(iaasLogFilePath, "# Counter Updates for : " +
370         ruleID + ": " + instanceID + Counter[0] + " " + Counter[1]);
371
372     while (Counter[1] >= threshold[1] ||
373         Counter[0] >= threshold[0]) {
374         //threshold violated
375         //counter reset;
376         Counter[0] = 0; Counter[1] = 0;
377         optimizationCounters.set(i, Counter);
378         re.updateCounters(ruleID, Counter);
379         optimizationSchedules.get(i).cancel(); //cancel
380         current schedule
381         onGoingOptimization[0] = true;
382         IaaSOptimization is = new IaaSOptimization(
383             this, onGoingOptimization[0]);
384
385         System.out.println("***Optimized Scaling initialised!

```

```

386         " + ruleID + "****");
387     GreenIaaSPanel.refreshConsole(
388         "****Optimized Scaling initialised! " +
389         ruleID + "****");
390     fo.addToLog(iaaSLogFilePath,
391         "****Optimized Scaling initialised! " +
392         ruleID + "****");
393     if (is.scalingSucceeded()) { //success
394
395         instances.add(j,
396         rp.getInstanceIDWithRuleIDFromRuleElement(ruleID));
397         //get new instance from updated rule
398
399         if (re.ruleEvolutionSucceeded(ruleID,
400             filteredMonitorValues)) {
401             System.out.println(
402                 "###Rule parameters evolved,
403                 optimization complete! " +
404                 ruleID + "###");
405             GreenIaaSPanel.refreshConsole(
406                 "Rule parameters evolved,
407                 optimization complete! " +
408                 ruleID + "###");
409             fo.addToLog(iaaSLogFilePath,
410                 "Rule parameters evolved,
411                 optimization complete! " +
412                 ruleID + "###");
413         } else {
414             System.err.println(
415                 "Rule parameters failed to evolve, "
416                 + "optimization finished with minor
417                 errors! " + ruleID);
418         }
419         optimizationSchedules.add(i, new Schedule(
420             rp.getAllOptimizationRules().get(i) ,
421             i, j)); //begin new schedule
422         optimizationTimers.get(i).scheduleAtFixedRate(
423             optimizationSchedules.get(i), delay,
424             (int)Math.round((milisecond*frequency)));
425         onGoingOptimization[0] = false;
426     } else {
427         System.err.println("Nooooooooo...Error happend " +
428             Calendar.getInstance().getTimeInMillis());
429         onGoingOptimization[0] = false;
430         GreenIaaSPanel.refreshConsole(
431             "!!! Error happened while optimising: "
432             + ruleID + " when trying to scale: "
433             + instanceID + ", " + "rety next time");
434         fo.addToLog(iaaSLogFilePath,
435             "!!! Error happened while optimising: "
436             + ruleID + " when trying to scale: " +
437             instanceID + ", " + "rety next time");
438     }
439 }
440 } else {
441     System.out.println("# Awaiting monitor data...
442     for instance: " + instanceID);
443     GreenIaaSPanel.refreshConsole("# Awaiting monitor data...
444     for instance: " + instanceID);
445 }
446 }
447
448 } else if (optimizationType.contains("PaaSOptimization")) { //PaaS
449 optimisation
450     this.applicationName = applications.get(j);
451     if (applicationName.length() == 0) {
452         System.err.println(
453             "Error retrieving Application Name... " +
454             Calendar.getInstance().getTimeInMillis());
455     } else {
456         boolean paaSMonitorStatisticsAvailable =
457             //get latest utilisation data for application
458             ur.isPaaSMonitorDataAvailable(optimizationType,
459             applicationName, metrics, statistics, periods,
460             frequency, monitorInternalInterval);
461         if (paaSMonitorStatisticsAvailable) {
462             //get latest utilisation data for application
463             latestMonitorValue =

```

```

464         ur.getPaaSLatestDominantMonitorStatistics();
465         System.out.println("Monitor data: " + latestMonitorValue);
466         fo.addToLog(paaSLogFilePath, "#" + ruleID + " with
467         application " +
468         applicationName + " RV: " + latestMonitorValue + " at " +
469         Calendar.getInstance().getTime());
470
471         filteredMonitorValues.add(latestMonitorValue);
472         //adding data to list for threshold count
473         while (filteredMonitorValues.size() >=
474         monitorInternalValuesCount) {
475             filteredMonitorValues.removeFirst();
476         }
477         //threshold count
478         for (int value : filteredMonitorValues) {
479             if (value >= upLimit || value <= downLimit) {
480
481                 if (value >= upLimit) {
482
483                     Counter[1]++;
484
485                     System.out.println("# Updates: Due to " +
486                     value + " >= " +
487                     upLimit + ", Uplimit Counter updated for " +
488                     applicationName);
489
490                 } else if (value <= downLimit) {
491                     Counter[0]++;
492                     System.out.println("# Updates: Due to " +
493                     value + " <= " +
494                     downLimit + ", Downlimit Counter updated for
495                     " + applicationName);
496
497                 }
498             } else {
499                 System.out.println(
500                 "# Updates: Monitor value is within limits
501                 for " + applicationName + " in rule: " + ruleID);
502
503             }
504         }
505         //counter updates
506         optimizationCounters.set(i, Counter);
507         re.updateCounters(ruleID, Counter);
508         GreenPaaSPanel.refreshConsole(
509             "# Counter Updates for : " + ruleID + ": " +
510             applicationName + Counter[0] + " " + Counter[1]);
511         fo.addToLog(paaSLogFilePath,
512             "# Counter Updates for : " + ruleID + ": " +
513             applicationName + Counter[0] + " " + Counter[1]);
514
515         while (Counter[1] >= threshold[1] ||
516         Counter[0] >= threshold[0]) {
517             //threshold violated
518             //counter reset
519             Counter[0] = 0; Counter[1] = 0;
520             optimizationCounters.set(i, Counter);
521             re.updateCounters(ruleID, Counter);
522             optimizationSchedules.get(i).cancel();//cancel
523         current schedule
524
525         onGoingOptimization[1] = true;
526         PaaSOptimization ps = new PaaSOptimization(
527             this, onGoingOptimization[1]);
528
529         System.out.println("***Optimized Scaling initialised!
530         " + ruleID + "****");
531         GreenIaaSPanel.refreshConsole(
532             "***Optimized Scaling initialised! " + ruleID
533             + "****");
534         fo.addToLog(iaasLogFilePath,
535             "***Optimized Scaling initialised! " + ruleID
536             + "****");
537         if (ps.scalingSucceeded()) { //success
538
539             if (re.ruleEvolutionSucceeded(ruleID,
540             filteredMonitorValues)) {
541                 System.out.println(
542                     "Rule parameters evolved,

```

```

542         optimization complete! " +
543         ruleID + "###");
544         GreenPaaSPanel.refreshConsole(
545             "Rule parameters evolved,
546             optimization complete! " +
547             ruleID + "###");
548         fo.addToLog(paaSLogFilePath,
549             "Rule parameters evolved,
550             optimization complete! " +
551             ruleID + "###");
552     } else {
553         System.err.println("Rule parameters failed to
554         evolve, optimization finished with minor errors!
555         " + ruleID);
556     }
557     optimizationSchedules.add(
558         i, new
559         Schedule(rp.getAllOptimizationRules().get(i), i,
560             j));
561     //begin new schedule
562     optimizationTimers.get(i).scheduleAtFixedRate(
563         optimizationSchedules.get(i), delay,
564         (int)Math.round((milisecond*frequency)));
565     onGoingOptimization[1] = false;
566 } else {
567     System.err.println("Nooooooooo...Error happend " +
568     Calendar.getInstance().getTimeInMillis());
569     onGoingOptimization[1] = false;
570     GreenPaaSPanel.refreshConsole(
571         "!!! Error happened while optimising: "
572         + ruleID + " when trying to scale: " +
573         applicationName + ", " + "rety next time");
574     fo.addToLog(paaSLogFilePath,
575         "!!! Error happened while optimising: "
576         + ruleID + " when trying to scale: " +
577         applicationName + ", " + "rety next time");
578     }
579 }
580 } else {
581     System.out.println("# Awaiting monitor data... "
582         + "for application: " + applicationName);
583     GreenPaaSPanel.refreshConsole(
584         "# Awaiting monitor data... "
585         + "for application: " + applicationName);
586     }
587 }
588 } else {
589     System.err.println("Err validating optimization type #3 " +
590     Calendar.getInstance().getTimeInMillis());
591     }
592 }
593 }
594 }
595 }
596 }

```
